# Supplementary material for: An elaborate structure investigation of the chiral polymorph A-enriched zeolite beta
Source: Royal Society of Chemistry journal article supplement (doi:10.1039/c6ce00043f), 2016-01-01

## ELECTRONIC SUPPLEMENTARY INFORMATION

### An elaborate structure investigation of the chiral polymorph A-enriched zeolite beta

Mingquan Tong,<sup>ac</sup> Daliang Zhang,<sup>a</sup> Liangkui Zhu,<sup>a</sup> Jun Xu,<sup>b</sup> Feng Deng,<sup>b</sup> Ruren Xu,<sup>a</sup> and Wenfu Yan<sup>\*a</sup>

<sup>a</sup> State Key Laboratory of Inorganic Synthesis and Preparative Chemistry, College of Chemistry, Jilin University, 2699 Qianjin Street, Changchun 130012 China. E-mail: yanw@jlu.edu.cn

<sup>b</sup> State Key Laboratory of Magnetic Resonance and Atomic and Molecular Physics, Wuhan Institute of Physics and Mathematics, the Chinese Academy of Sciences, Wuhan 430071, P. R. China.

<sup>c</sup> Chemical Research Institute, Yang Quan Coal Industry (GROUP) CO., LTD, Taiyuan 030006, P. R. China.

**Figure S.** HRTEM study of A-Beta aligned along the [1 0 0] direction. A fold line is added in the image to mark the stacking sequences of the 12-ring channels.

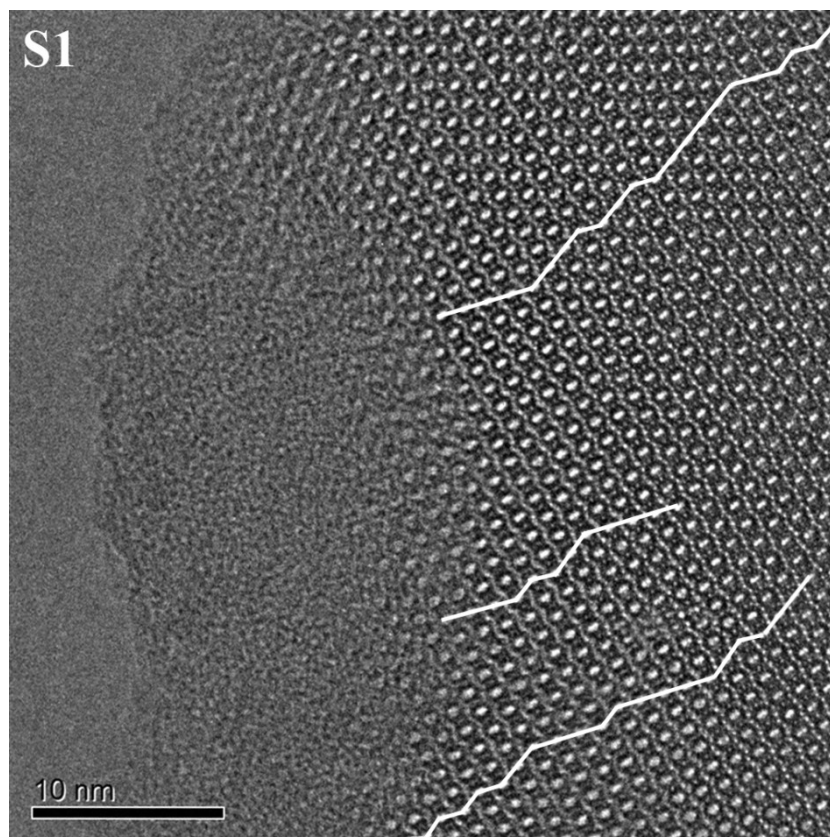

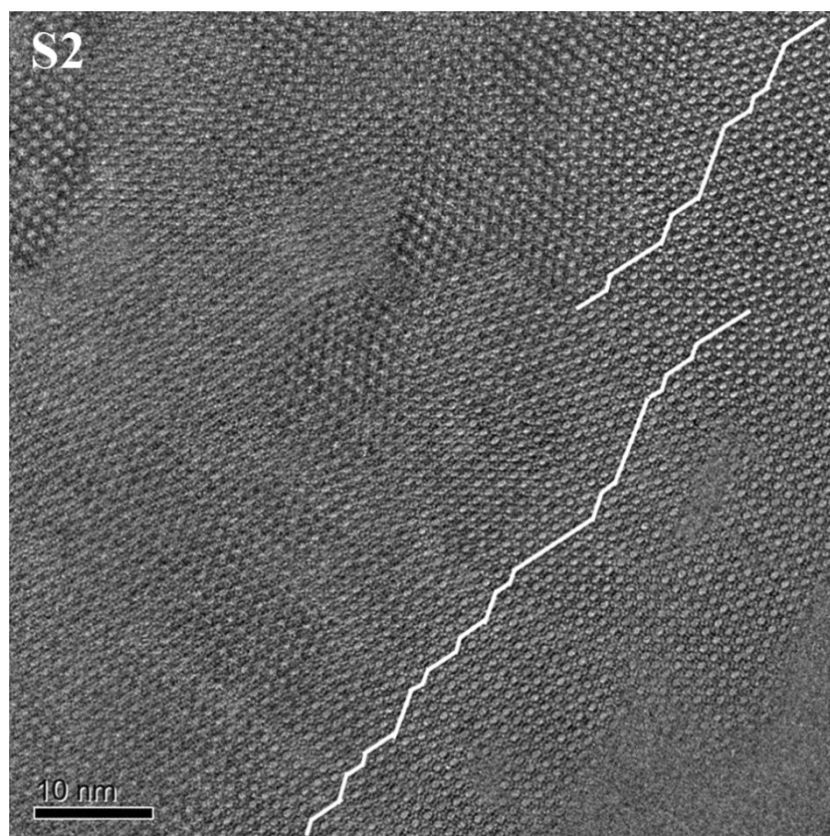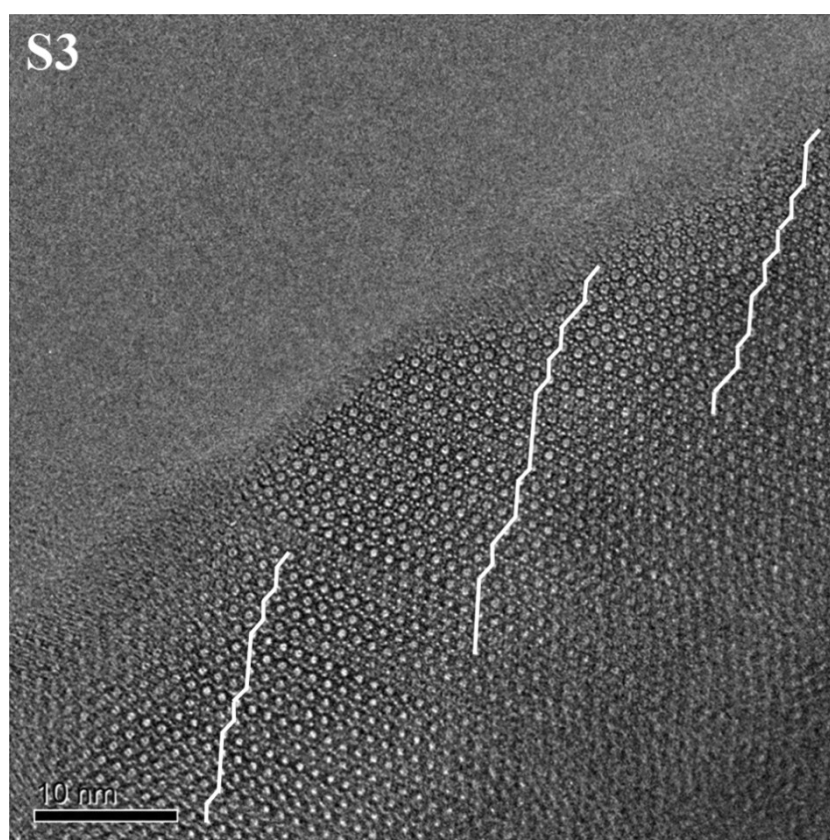

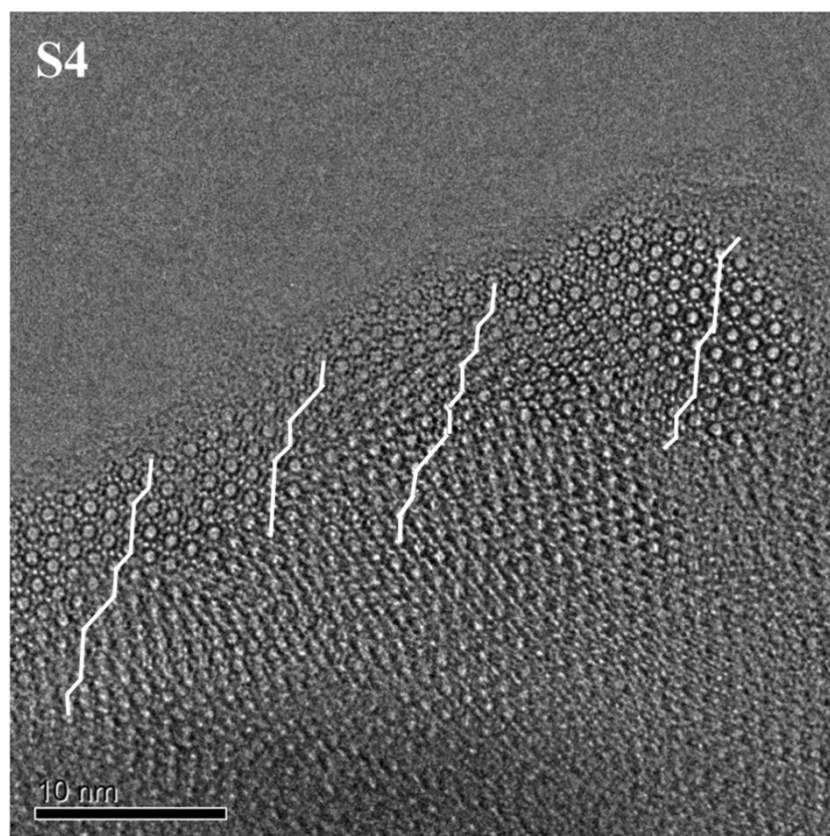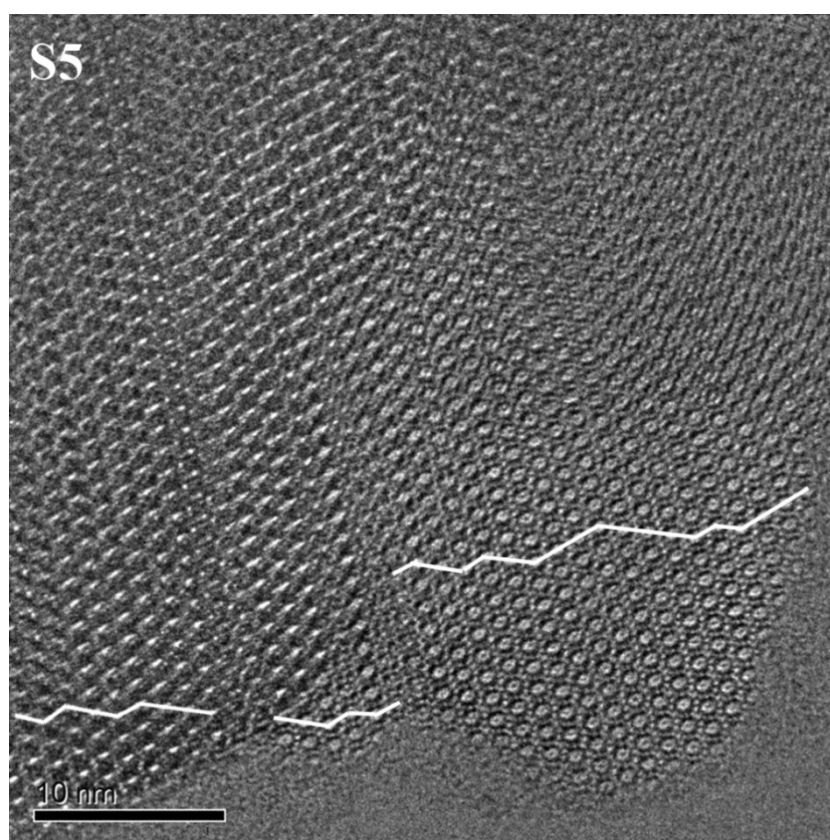

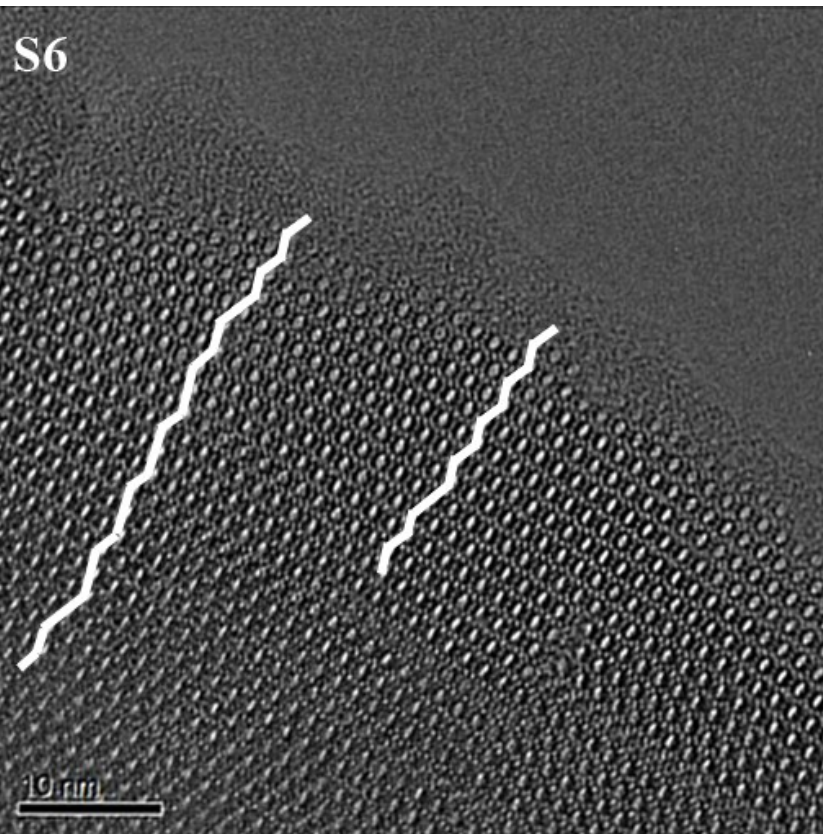

Supplement: c6ce00043f1.pdf [file c6ce00043f1.pdf]
